# Supplementary material
Source: PubMed Central journal article supplement (PMC10591904)
Supplement: NIHMS1933307-supplement-1.pdf [file NIHMS1933307-supplement-1.pdf]

**Supplementary Material:**

***Elevated CRP and TNF- $\alpha$  levels are associated with blunted neural oscillations serving fluid intelligence***

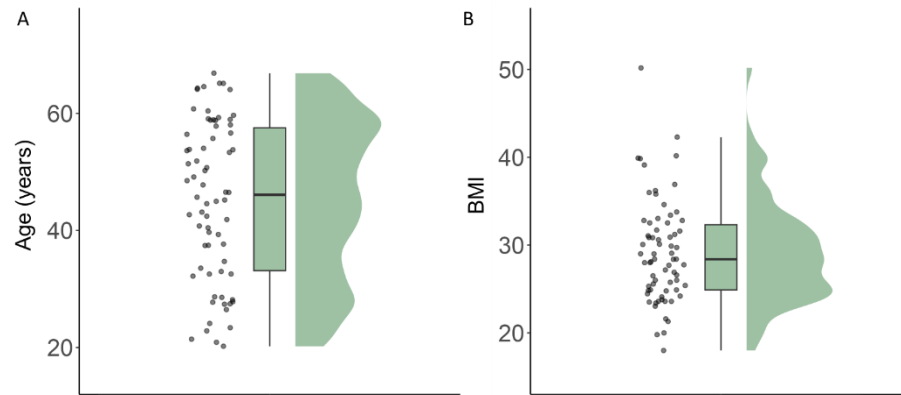

**Supplemental Figure 1. Distributions of age and body mass index (BMI).** Raincloud plots with boxplots and individual data points depicting the medians, interquartile ranges, and overall distributions for (A) age and (B) BMI, separately.

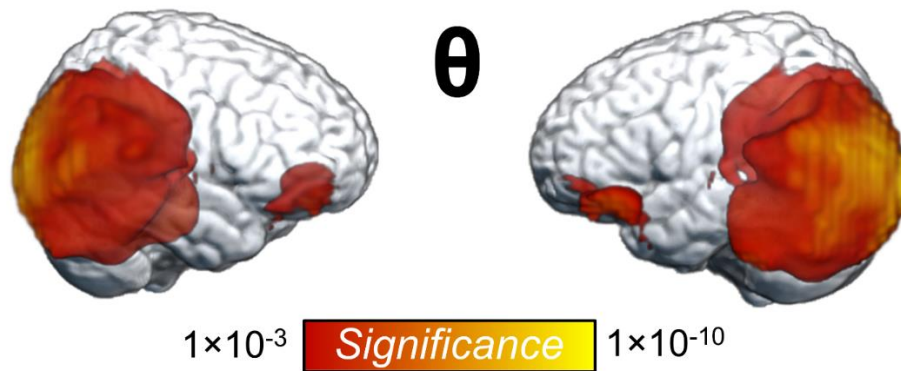

**Supplemental Figure 2. Significant oscillatory theta responses during the abstract reasoning task.** Whole-brain one-sample t-tests revealed significant oscillatory theta responses in the medial and lateral occipital cortices bilaterally, as well as temporo-parietal junction, inferior parietal, supramarginal gyri, and inferior frontal gyri bilaterally.

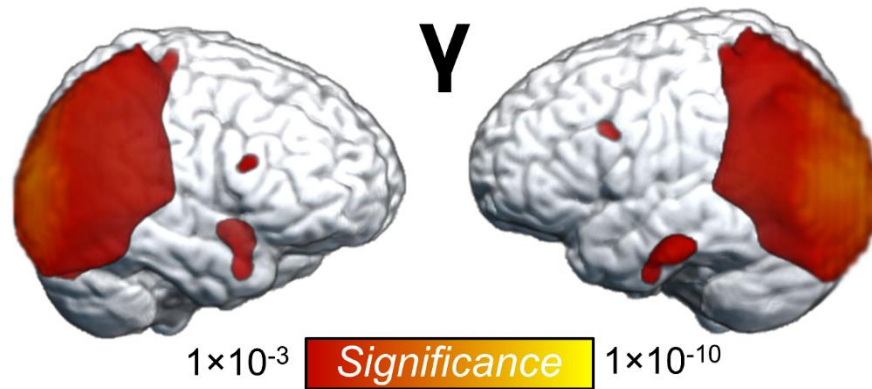

**Supplemental Figure 3. Significant oscillatory gamma responses during the abstract reasoning task.**

Whole-brain one-sample t-tests revealed significant oscillatory gamma responses in the bilateral medial and lateral occipital cortices, superior and inferior parietal cortices, supramarginal gyri, temporo-parietal junction, posterior temporal cortices, and bilateral prefrontal cortices.

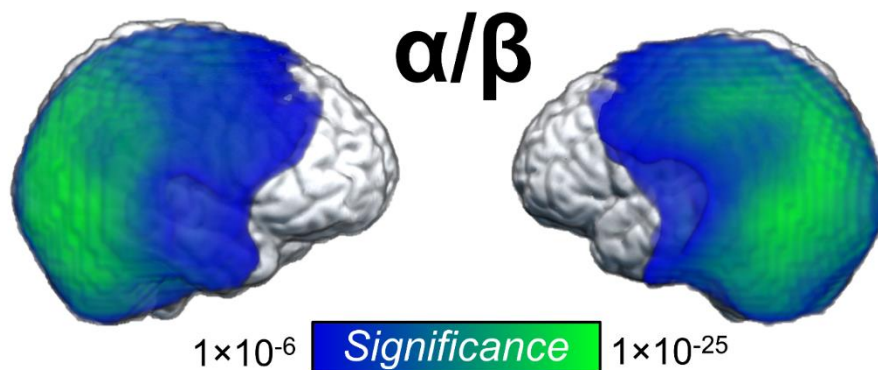

**Supplemental Figure 4. Significant oscillatory alpha/beta responses during the abstract reasoning task.**

Whole-brain one-sample t-tests revealed significant oscillatory alpha/beta responses in the medial and lateral occipital cortices, cerebellar cortices, inferior and superior parietal, supramarginal gyri, and the frontal cortices bilaterally.
